# Supplementary material
Source: PubMed Central journal article supplement (PMC2767090)
Supplement: msn270_1.pdf [file msn270_1.pdf]

| <b>Pool Name</b> | <b>Strains</b>                                                                     | <b>Geographical origin</b>          | <b>Reference</b> |
|------------------|------------------------------------------------------------------------------------|-------------------------------------|------------------|
| Wi               | wi1, wi3, wi15, wi18,wi41.5, wi45, wi68,wi77,wi83,wi98                             | Wolfskill Orchard, Davis, CA        | Sergey Nuzhdin   |
| We1              | we4, we10, we11, we25, we44, we47, we50, we60, we67, we80                          | Raleigh, NC                         | Greg Gibson      |
| We2              | we13, we17, we28, we33, we37, we63, we70, we75, we88, we91                         | Raleigh, NC                         | Greg Gibson      |
| NB               | NB1, NB6, NB7, NB8, NB12, NB13, NB14, NB16                                         | New Buffalo, MI                     | Bettina Harr     |
| CSW              | 3B, 6D, 11D, 20C, 23D, 25C, 29B, 36D                                               | Countryside Winery, Blountville, TN | Lev Yampolsky    |
| Zmel             | zmel58, zmel81, zmel125, zmel131, zmel145, zmel159, zmel178, zmel191, zmel196      | Zimbabwe                            | Charles Aquadro  |
| ZW               | ZW104, ZW109, ZW122, ZW140, ZW141, ZW142, ZW144, ZW149, ZW155, ZW156, ZW177, ZW183 | Zimbabwe                            | Peter Andolfatto |
| KY               | KY01, KY10, KY12, KY16, KY20, KY23, KY24, KY38, KY42, KY91, KY106                  | Kenya                               | Peter Andolfatto |
| MW               | MW7, MW8, MW11, MW12, MW14, MW15, MW27, MW28, MW35, MW56, MW60                     | Malawi                              | –                |

Table S1: Summary of strains used.

| Flybase ID  | Primer   | Sequence (5' → 3')        | Primer  | Sequence (5' → 3')         | Primer  | Sequence (5' → 3')          |
|-------------|----------|---------------------------|---------|----------------------------|---------|-----------------------------|
| Fbit0018877 | 18877_FL | AACGTCGATTTTCGATTGACT     | 18877_R | AGGATGGTGGCTTTGGTACTT      | 18877_L | TCCTCACATGATTAGTGAGAGGTTTG  |
| Fbit0018878 | 18878_FL | TACTGTTTGCCTGCCGTTTTGTA   | 18878_R | ATAAGGAACCCCAACAACA        | 18878_L | TCCTCACATGATTAGTGAGAGGTTTG  |
| Fbit0018879 | 18879_FL | ACAGCCGAAACTGAGAGAAAGAG   | 18879_R | AATACTTTTGTGCAGAAAAGGAAAA  | 18879_L | GTCCTCACATGATTAGTGAGAGGTTTG |
| Fbit0019079 | 19079_FL | GGTGCAAAAGAAAGGGCTAAAGAA  | 19079_R | ATGCGAAATTTTATTGAACGGCT    | 19079_L | GGAATACAGATCTGGGGTATCGC     |
| Fbit0019133 | 19133_FL | ACGTTTAACTGGGGCTTAAGAA    | 19133_R | TTTTTCACTGCCAATTGGTACTC    | 19133_L | TCCTCACATGATTAGTGAGAGGTTTG  |
| Fbit0019158 | 19158_FL | GAAATGGGTGCAACTTTTGATG    | 19158_R | AAAGATTAGCAGTGAATCGGCTC    | 19158_L | TCCTCACATGATTAGTGAGAGGTTTG  |
| Fbit0019165 | 19165_FL | ACACCAATTAAGCCGTCAGGTTT   | 19165_R | TGATTTAAACGCCAACAACCC      | 19165_L | GGAATACAGATCTGGGGTATCGC     |
| Fbit0019312 | 19312_FL | ATTTGACACACTGTGTCTGTTGC   | 19312_R | TCGACTCCCAATTACAGTTAGCG    | 19312_L | TCCTCACATGATTAGTGAGAGGTTTG  |
| Fbit0019315 | 19315_FL | GTCGGTTTTGCTGTCCAACTATG   | 19315_R | GTCCCTAAAAGTGGGAGTGACG     | 19315_L | TCCTCACATGATTAGTGAGAGGTTTG  |
| Fbit0019378 | 19378_FL | AGAAACAAGTGTCCAAAAGCAGT   | 19378_R | CGCAGATTTTAAATGTACTTGCCCTC | 19378_L | TCCTCACATGATTAGTGAGAGGTTTG  |
| Fbit0019388 | 19388_FL | TGTCATTTCAATAATTTGGCCCAAG | 19388_R | ATTTGGCACTCCTGAAATTTGTT    | 19388_L | CACCTGGACAACCCATAAGACCC     |
| Fbit0019410 | 19410_FL | AGCAATCCATCGAATACGAAAAA   | 19410_R | CCAAACCCAGACTAGTCAGCAATGG  | 19410_L | GGAATACAGATCTGGGGTATCGC     |
| Fbit0019426 | 19426_FL | AAAAGTCGGACCTATGAGGCAACT  | 19426_R | AAAAATAAGACAAAGTGACACGCGG  | 19426_L | TCCTCACATGATTAGTGAGAGGTTTG  |
| Fbit0019604 | 19604_FL | GAGCCATCATGTACACACACAAG   | 19604_R | AAACAGGAACCAACAAGGAAGC     | 19604_L | GATTA AAAAGGAGGTTTCCGC      |
| Fbit0020056 | 20056_FL | GATTAGCATCACACTGGATTCCG   | 20056_R | GGGAGCTGCCATCCTATTTTCTA    | 20056_L | TCAAAGGATGCAACAACCTCGAT     |
| Fbit0020057 | 20057_FL | ATTTCTGTGCAAGAGGTTGTGTG   | 20057_R | CCCATATCACATTTAGCTGATCTTTC | 20057_L | TCCTCACATGATTAGTGAGAGGTTTG  |
| Fbit0020125 | 20125_FL | GGGCACAGCATGGAGAAATAATA   | 20125_R | GGAACTTACCCACACACTTGCAG    | 20125_L | GGAATACAGATCTGGGGTATCGC     |
| Fbit0020149 | 20149_FL | TCGCCCTCCATTAACITTTGATTT  | 20149_R | GAAAAGGTTTCGTTAGCAATGTG    | 20149_L | GGAATACAGATCTGGGGTATCGC     |

Table S2: Summary of primers used in this study. The primer label '\*\_FL' corresponds to a 'Flanking' primer, 5' of the insertion (see also **Materials and Methods**); the label '\*\_L' corresponds to a 'Left' primer found in the interior of the insertion; the label '\*\*\_R' corresponds to a 'Right' primer found 3' of the insertion.
